# Supplementary material
Source: publisher figshare collection journal article supplement (https://gsajournals.figshare.com/ndownloader/files/16411775)
Supplement: Supplementary file 1 [file 16411775]

## Sheet: ult1 4DAG
Table S7. Transcription factor and transcription-related genes regulated by ULT1 in 4 DAG apices
Array element	ID	Locus	Description	logFC	FC, ult1-3	AveExpr (log2)	AveExpresn	t	p-value	adj. p-value
261782_at	16882	AT1G76110	high mobility group (HMG1/2) family protein / ARID/BRIGHT DNA-binding domain-containing protein	-1.82011	0.283199	6.52142	91.8632	-8.24064	4.41686e-05	0.0102805
248864_at	3964	AT5G46760	MYC3; basic helix-loop-helix (bHLH) family protein	-1.35785	0.390162	8.03481	262.252	-12.0711	2.83952e-06	0.00214419
256889_at	11989	AT3G24010	ATING1 (ARABIDOPSIS THALIANA INHIBITOR OF GROWTH 1); PHD finger family protein	-1.02007	0.493092	8.72345	422.688	-10.0859	1.05077e-05	0.0047798
267509_at	22609	AT2G45660	SOC1 (SUPPRESSOR OF OVEREXPRESSION OF CO 1)/AGL20; MADS transcription factor	-0.835544	0.560372	5.8939	59.4621	-6.71712	0.000179044	0.0226888
260684_at	15784	AT1G17590	NF-Y A8 (NUCLEAR FACTOR Y SUBUNIT A8); CCAAT-binding transcription factor family protein	-0.667082	0.629779	5.28471	38.9814	-5.72805	0.000507287	0.0341108
256469_at	11569	AT1G32540	LOL1 (LSD ONE LIKE 1) zinc finger transcription factor protein	-0.597957	0.660689	9.26847	616.72	-6.12666	0.000328726	0.0291682
265359_at	20459	AT2G16720	MYB7 (MYB domain protein 7); DNA binding / transcription factor	0.617251	1.53395	7.64562	200.244	6.00305	0.000375268	0.0305034
261139_at	16239	AT1G19700	BEL10 (BEL1-LIKE HOMEODOMAIN 10); DNA binding / transcription factor	0.650087	1.56926	6.2015	73.5933	5.3178	0.000809994	0.0422199
257053_at	12153	AT3G15210	ATERF-4/ATERF4/ERF4/RAP2.5 (ETHYLENE RESPONSIVE ELEMENT BINDING FACTOR 4); DNA binding / protein binding / transcription factor/ transcriptional repressor	0.657974	1.57786	9.34265	649.258	5.91993	0.000410651	0.0320278
263536_at	18636	AT2G25000	WRKY60 (WRKY DNA-binding protein 60); transcription factor	0.683419	1.60594	5.73341	53.202	5.31407	0.000813529	0.0422199
247351_at	2451	AT5G63790	ANAC102 (Arabidopsis NAC domain containing protein 102); transcription factor	0.704138	1.62917	9.83507	913.381	5.73228	0.000504904	0.0341108
260528_at	15628	AT2G47260	WRKY23 (WRKY DNA-binding protein 23); transcription factor	0.733652	1.66284	5.56013	47.1809	5.57331	0.000603625	0.0365217
259834_at	14934	AT1G69570	CDF5 (CYCLING DOF FACTOR 5); zinc finger transcription factor	0.863149	1.819	7.63341	198.557	7.89547	5.95003e-05	0.0121179
260819_at	15919	AT1G06850	ATBZIP52 (BASIC LEUCINE-ZIPPER 52); bZIP transcription factor, putative	0.879884	1.84023	6.32227	80.019	6.69691	0.000182687	0.0227683
257769_at	12869	AT3G23050	IAA7 (AUXIN RESISTANT 2); transcription factor	0.887238	1.84963	11.8893	3793.47	5.19732	0.000933338	0.0451048
245328_at	428	AT4G14465	AHL20 (AT-HOOK MOTIF NUCLEAR-LOCALIZED PROTEIN 20); AT-hook DNA binding motif protein	0.893748	1.858	7.46734	176.968	6.01776	0.000369363	0.0303064
252193_at	7293	AT3G50060	MYB77 (MYB DOMAIN PROTEIN 77); MYB family transcription factor	0.903979	1.87122	8.46833	354.177	5.51889	0.000642167	0.0377009
257990_at	13090	AT3G19860	bHLH121; basic helix-loop-helix (bHLH) family protein	1.01006	2.01399	8.41997	342.503	7.15556	0.000116919	0.0181424
248611_at	3711	AT5G49520	WRKY48 (WRKY DNA-binding protein 48); transcription factor	1.0171	2.02385	5.77255	54.6651	6.55516	0.000210674	0.0247705
265856_at	20956	AT2G42430	LBD16 (ASYMMETRIC LEAVES2-LIKE16) DNA binding protein	1.03371	2.04729	5.33806	40.4499	7.29361	0.00010266	0.0167262
259274_at	14374	AT3G01220	ATHB20 (ARABIDOPSIS THALIANA HOMEOBOX PROTEIN 20); DNA binding / transcription factor	1.09471	2.1357	5.01309	32.2916	10.7371	6.6816e-06	0.0034638
249928_at	5028	AT5G22250	CAF1B (CCR4-ASSOCIATED FACTOR 1B); CCR4-NOT transcription complex protein	1.3107	2.48062	7.27479	154.857	6.36641	0.000255608	0.0263536
248799_at	3899	AT5G47230	ERF5 (ETHYLENE RESPONSIVE ELEMENT BINDING FACTOR 5); DNA binding / transcription factor/ transcriptional activator	1.33849	2.52887	7.49987	181.003	5.12879	0.00101261	0.0462666
258139_at	13239	AT3G24520;AT3G24518	[AT3G24520, AT-HSFC1 (Arabidopsis thaliana heat shock transcription factor C1); DNA binding / transcription factor]	1.35223	2.55306	6.90756	120.055	8.65818	3.12168e-05	0.00858623
260037_at	15137	AT1G68840	RAV2 (REGULATOR OF THE ATPASE OF THE VACUOLAR MEMBRANE); DNA binding / transcription factor	1.36323	2.57261	9.61163	782.33	7.64881	7.40986e-05	0.0140849
255753_at	10853	AT1G18570	MYB51 (MYB domain protein 51); DNA binding / transcription factor	1.5351	2.89809	7.47641	178.084	7.05122	0.000129161	0.019256
260744_at	15844	AT1G15010	mediator of RNA polymerase II transcription subunit	1.62331	3.08082	6.68728	103.056	6.40603	0.000245359	0.0261525
256009_at	11109	AT1G19210	ERF17 (ETHYLENE RESPONSE FACTOR 17); DREB subfamily AP2 domain-containing transcription factor	1.62748	3.08973	5.99076	63.5913	5.62019	0.000572461	0.0352348
250476_at	5576	AT5G10140	FLC (FLOWERING LOCUS C); MADS domain transcription factor	1.65232	3.14339	5.93552	61.2025	13.896	1.00307e-06	0.00118737
261648_at	16748	AT1G27730	STZ (SALT TOLERANCE ZINC FINGER); nucleic acid binding / transcription factor/ zinc ion binding	1.67453	3.19216	9.13916	563.847	5.42416	0.000715899	0.0395391
261892_at	16992	AT1G80840	WRKY40 (WRKY DNA-binding protein 40); transcription factor	1.87695	3.67297	8.6988	415.527	5.04721	0.00111677	0.0490906
258434_at	13534	AT3G16770	ATEBP/RAP2.3 (RELATED TO AP2 3); DNA binding / protein binding / transcription factor/ transcriptional activator	2.13024	4.37791	7.59908	193.888	13.736	1.09315e-06	0.00118737
264101_at	19201	AT1G79000	HAC1 (P300/CBP acetyltransferase-related protein 2 gene); transcription cofactor	2.33182	5.0344	7.22622	149.73	14.1176	8.9175e-07	0.00118737
253259_at	8359	AT4G34410	ERF109 (ETHYLENE RESPONSE FACTOR 109) AP2 transcription factor family	2.88236	7.37356	7.2471	151.913	5.33502	0.000793874	0.0419417
			Black = classical transcription factor
			Purple = transcriptional regulator

## Sheet: ult1 IFM
Table S7. Transcription factor and transcription-related genes regulated by ULT1 in inflorescence apices
Array element	ID	Locus	Description	logFC	FC, ult1-3	AveExpr(log2)	AveExpresn	t	p-value	adj. p-value
252367_at	7467	AT3G48360	BT2 (BTB and TAZ domain protein 2); protein binding / TRAF transcription factor	-1.18479	0.4399	8.31	317.33	-11.4789	3e-06	0.000548
258133_at	13233	AT3G24500	ATMBF1C/MBF1C (MULTIPROTEIN BRIDGING FACTOR 1C); DNA binding / transcription coactivator/ transcription factor	-1.09252	0.4689	7.67	204	-13.5073	1e-06	0.000244
248864_at	3964	AT5G46760	MYC3; basic helix-loop-helix (bHLH)transcription factor family protein	-1.47317	0.360189	9.48307	715.628	-25.5374	5.91378e-09	8.47918e-06
262399_at	17499	AT1G49500	transcription initiation factor TFIID subunit 1b-like protein	-1.01969	0.4932	9.91	960.91	-15.6213	0	0.000119
261782_at	16882	AT1G76110	high mobility group (HMG1/2) family protein / ARID/BRIGHT DNA-binding domain-containing protein	-0.869994	0.547149	6.82412	113.309	-10.4642	6.03659e-06	0.000834513
254017_at	9117	AT4G26170	ET1 (EFFECTOR OF TRANSCRIPTION 1)	-0.865265	0.5489	4.67	25.38	-8.15994	3.8e-05	0.00257
256889_at	11989	AT3G24010	ATING1 (ARABIDOPSIS THALIANA INHIBITOR OF GROWTH 1); PHD finger family protein	-0.828098	0.563271	9.50392	726.05	-14.7266	4.4373e-07	0.000155715
247543_at	2643	AT5G61600	ERF104 (ETHYLENE RESPONSE FACTOR 104); AP2 domain transcription factor	-0.729511	0.603108	6.99094	127.199	-9.31182	1.44029e-05	0.00147987
263963_at	19063	AT2G36080	ABS2, B3 DNA-binding domain transcription factor	-0.718526	0.607718	7.62462	197.351	-8.17307	3.73901e-05	0.00257031
258809_at	13909	AT3G04070	ANAC047 (Arabidopsis NAC domain containing protein 47); transcription factor	0.597492	1.51308	6.51173	91.2486	5.17395	0.000848637	0.0208368
257262_at	12362	AT3G21890	BBX31 (B-BOX DOMAIN PROTEIN 31) zinc finger protein	0.608253	1.52441	6.25305	76.2703	7.74069	5.5271e-05	0.00332647
263158_at	18258	AT1G54160	NF-Y A5 (NUCLEAR FACTOR Y, SUBUNIT A5); CCAAT-binding transcription factor (CBF-B/NF-YA) family protein	0.67616	1.59788	7.33356	161.295	10.4087	6.28241e-06	0.000858095
260355_at	15455	AT1G69180	CRC (CRABS CLAW); YABBY transcription factor	0.682949	1.60542	9.0852	543.148	13.2971	9.75844e-07	0.000255851
262022_at	17122	AT1G35490	bZIP family transcription factor	0.690215	1.61352	4.94225	30.7443	7.95051	4.56253e-05	0.00292335
262378_at	17478	AT1G72830	HAP2C (Heme activator protein (yeast) homolog 2C); transcription factor	0.754986	1.6876	6.7	103.71	8.10275	4e-05	0.002678
261942_at	17042	AT1G22590	AGL87 (AGAMOUS-LIKE 87); MADS-box family protein	0.809826	1.753	7.62057	196.798	11.7615	2.49488e-06	0.000462669
258058_at	13158	AT3G28980	mediator of RNA polymerase II transcription subunit-like protein	0.810188	1.7534	9.68	819.58	4.97602	0.001084	0.02481
260140_at	15240	AT1G66390	PAP2 (PRODUCTION OF ANTHOCYANIN PIGMENT 2); MYB DNA binding / transcription factor	0.815678	1.76013	5.4869	44.8456	10.6437	5.31214e-06	0.00077673
258890_at	13990	AT3G05690	HAP2B (Heme activator protein (yeast) homolog 2B, unfertilized embryo sac 8); transcription factor	0.815758	1.7602	6.71	104.53	8.08676	4e-05	0.002708
257769_at	12869	AT3G23050	IAA7 (AUXIN RESISTANT 2); transcription factor	0.878528	1.8385	10.1129	1107.36	16.1881	2.12791e-07	9.51718e-05
250688_at	5788	AT5G06510	NF-Y A10 (nuclear factor Y, subunit A10); CCAAT-binding transcription factor (CBF-B/NF-YA) family protein	0.88537	1.84724	5.82688	56.7632	7.01639	0.000110736	0.00527325
264341_at	19441	AT1G70270	Helix-loop-helix DNA-binding transcription factor	0.923896	1.89723	6.80222	111.602	8.04746	4.1813e-05	0.00277254
258101_at	13201	AT3G23590	MED33A, MED5A	1.04853	2.0684	8.59	385.85	15.532	2.93622e-07	0.000121773
245819_at	919	AT1G26310	CAL (CAULIFLOWER); DNA binding / transcription factor	1.27514	2.42022	7.09355	136.575	13.7393	7.58579e-07	0.000219028
256580_s_at	11680	AT3G28810;AT3G28820	mediator of RNA polymerase II transcription subunit-like protein, putative	1.63943	3.1154	7.15	142.29	19.6586	0	3.4e-05
250476_at	5576	AT5G10140	FLC (FLOWERING LOCUS C); MADS domain transcription factor	2.44091	5.42984	6.3515	81.6565	28.3383	2.59299e-09	6.54664e-06
264101_at	19201	AT1G79000	HAC1 (P300/CBP acetyltransferase-related protein 2 gene); transcription cofactor	2.74343	6.6966	7.56	189.14	27.8778	0	7e-06
258434_at	13534	AT3G16770	ATEBP/RAP2.3 (RELATED TO AP2 3); DNA binding / protein binding / transcription factor/ transcriptional activator	2.74374	6.69802	7.78596	220.702	19.0573	5.9419e-08	4.10711e-05
			Black = classical transcription factor
			Purple = transcriptional regulator

## Sheet: clf-2 IFM
Table S7. Transcription factor and transcription-related genes regulated by CLF in inflorescence apices
Array element	ID	Locus	Description	logFC	FC, clf-2	AveExpr(log2)	AveExpresn	t	p-value	adj. p-value
265983_at	21083	AT2G18550	ATHB21/HB-2 (homeobox-2); DNA binding / transcription factor	4.38377	20.8759	7.59123	192.835	45.2243	3.09014e-12	7.83179e-09
250476_at	5576	AT5G10140	FLC (FLOWERING LOCUS C); MADS domain transcription factor	3.02327	8.13008	6.64268	99.9182	32.9985	5.72636e-11	5.44243e-08
258809_at	13909	AT3G04070	ANAC047 (Arabidopsis NAC domain containing protein 47); transcription factor	2.9144	7.53914	7.67018	203.683	26.189	4.82894e-10	2.56158e-07
256300_at	11400	AT1G69490	NAP (NAC-LIKE, ACTIVATED BY AP3/PI); transcription factor	2.78353	6.88537	9.06491	535.561	29.1777	1.78411e-10	1.45341e-07
246279_at	1379	AT4G36740	ATHB40 (ARABIDOPSIS THALIANA HOMEOBOX PROTEIN 40); DNA binding / transcription factor	2.74145	6.68743	7.11296	138.425	21.2572	3.27573e-09	9.4e-07
265817_at	20917	AT2G18050	HIS1-3 (HISTONE H1-3); DNA binding	2.59848	6.05649	7.64802	200.578	27.4666	3.11451e-10	1.92005e-07
263584_at	18684	AT2G17040	ANAC036 (Arabidopsis NAC domain containing protein 36); transcription factor	2.57099	5.94218	5.70749	52.2548	27.9825	2.62373e-10	1.87023e-07
246889_at	1989	AT5G25470	AP2/B3-like transcription factor	1.8336	3.56425	6.36309	82.3152	21.2797	3.24419e-09	9.4e-07
263295_at	18395	AT2G14210	ANR1; MADS domain transcription factor family protein	1.82934	3.55374	5.60386	48.633	17.9087	1.56193e-08	2.66682e-06
249467_at	4567	AT5G39610	ANAC092/ATNAC2/ATNAC6 (Arabidopsis NAC domain containing protein 92); protein heterodimerization/ protein homodimerization/ transcription factor	1.68866	3.22357	7.19085	146.103	11.4768	8.33193e-07	4.06962e-05
255952_at	11052	AT1G22130	AGL104; MADS domain transcription factor family protein	1.66721	3.176	5.55658	47.0649	19.0301	8.99294e-09	1.86481e-06
261892_at	16992	AT1G80840	WRKY40 (WRKY DNA-binding protein 40); transcription factor	1.63011	3.09538	6.25327	76.282	24.8166	7.92202e-10	3.47503e-07
247869_at	2969	AT5G57520	ZFP2 (ZINC FINGER PROTEIN 2); nucleic acid binding / transcription factor/ zinc ion binding	1.59187	3.0144	5.93619	61.2308	14.0255	1.41268e-07	1.11874e-05
257382_at	12482	AT2G40750	WRKY54 (WRKY DNA-binding protein 54); transcription factor	1.58964	3.00975	7.46653	176.868	22.3797	2.04521e-09	6.86047e-07
252367_at	7467	AT3G48360	BT2 (BTB and TAZ domain protein 2); protein binding / transcription regulator	1.57934	2.98834	9.69189	827.083	18.7952	1.00688e-08	2.05062e-06
266327_at	21427	AT2G46680	ATHB-7 (ARABIDOPSIS THALIANA HOMEOBOX 7); transcription factor	1.56221	2.95306	7.91394	241.175	20.5326	4.49739e-09	1.1418e-06
248606_at	3706	AT5G49450	bZIP1; bZIP family transcription factor	1.54393	2.91587	9.02341	520.375	21.9173	2.4762e-09	7.73727e-07
263783_at	18883	AT2G46400	WRKY46 (WRKY DNA-binding protein 46); transcription factor	1.44258	2.71807	6.51884	91.6993	17.2552	2.18806e-08	3.37227e-06
251705_at	6805	AT3G56400	WRKY70 (WRKY DNA-binding protein 70); transcription factor	1.3766	2.59657	9.12759	559.344	18.4828	1.17272e-08	2.22914e-06
254231_at	9331	AT4G23810	WRKY53 (WRKY DNA-binding protein 53); transcription factor	1.32546	2.50612	7.00925	128.823	11.973	5.74679e-07	3.03436e-05
251272_at	6372	AT3G61890	ATHB-12 (ARABIDOPSIS THALIANA HOMEOBOX PROTEIN 1); transcription factor	1.2956	2.4548	7.35989	164.266	16.8529	2.70904e-08	3.88637e-06
250099_at	5199	AT5G17300	RVE1; MYB family transcription factor	1.28506	2.43693	9.23437	602.313	16.1085	4.07449e-08	4.94357e-06
250287_at	5387	AT5G13330	RAP2.6L (related to AP2 6L); DNA binding / transcription factor	1.22065	2.33051	7.60612	194.836	16.6048	3.09773e-08	4.13233e-06
246523_at	1623	AT5G15850	COL1 (CONSTANS-LIKE 1); transcription factor/ zinc ion binding	1.20029	2.29786	9.73323	851.127	18.5	1.16285e-08	2.22895e-06
258930_at	14030	AT3G10040	HRA1 (HYPOXIA RESPONSE ATTENUATOR1); transcription factor	1.16919	2.24885	6.67134	101.923	8.79058	8.23457e-06	0.000210337
259977_at	15077	AT1G76590	PLATZ transcription factor family protein	1.16044	2.23525	6.70604	104.405	11.8148	6.45957e-07	3.26844e-05
249890_at	4990	AT5G22570	WRKY38 (WRKY DNA-binding protein 38); transcription factor	1.13277	2.1928	5.08625	33.9715	12.9	2.97406e-07	1.85858e-05
267028_at	22128	AT2G38470	WRKY33 (WRKY DNA-binding protein 33); transcription factor	1.13036	2.18914	6.83394	114.083	16.3506	3.56116e-08	4.49949e-06
254592_at	9692	AT4G18880	AT-HSFA4A (Arabidopsis thaliana heat shock transcription factor A4A); DNA binding / transcription factor	1.09751	2.13986	6.72783	105.994	13.0519	2.68077e-07	1.73717e-05
253872_at	8972	AT4G27410	RD26 (RESPONSIVE TO DESSICATION 26); transcription factor	1.09081	2.12993	8.06347	267.514	14.358	1.14565e-07	9.86121e-06
255666_at	10766	AT4G00390	DNA-binding storekeeper protein-related transcriptional regulator	1.07992	2.11391	6.35836	82.0461	13.6607	1.78717e-07	1.31078e-05
263963_at	19063	AT2G36080	B3 DNA-binding domain transcription factor	1.07729	2.11008	8.52253	367.737	13.4332	2.07541e-07	1.45543e-05
252483_at	7583	AT3G46600	GRAS transcription factor family protein	1.06983	2.09919	8.94525	492.935	14.503	1.04713e-07	9.29377e-06
262803_at	17903	AT1G21000	PLATZ transcription factor family protein	1.05598	2.07913	8.85267	462.297	10.6813	1.55827e-06	6.48616e-05
247351_at	2451	AT5G63790	ANAC102 (Arabidopsis NAC domain containing protein 102); transcription factor	1.05176	2.07305	8.12834	279.818	9.57877	3.97956e-06	0.000126779
263956_at	19056	AT2G35940	BLH1 (BLH1); DNA binding / transcription factor	1.04439	2.06249	9.74813	859.962	10.3043	2.12662e-06	8.0229e-05
253043_at	8143	AT4G37540	LOB domain protein 39 / lateral organ boundaries domain protein 39 (LBD39)	0.976976	1.96834	9.17257	577.058	14.7911	8.77843e-08	8.34317e-06
263379_at	18479	AT2G40140	CZF1/ZFAR1; zinc finger CCCH domain transcription factor	0.970631	1.9597	8.82541	453.642	14.325	1.1695e-07	1.00287e-05
248374_at	3474	AT5G51870	AGL71; MADS domain transcription factor	0.945863	1.92634	6.00825	64.367	13.0997	2.59511e-07	1.71127e-05
252495_at	7595	AT3G46770	B3 transcription factor family protein	0.945253	1.92553	8.84077	458.499	6.18907	0.000139125	0.00176835
258487_at	13587	AT3G02550	LOB domain protein 41 / lateral organ boundaries domain protein 41 (LBD41)	0.944783	1.9249	11.0136	2067.46	9.24606	5.37577e-06	0.000157207
245711_at	811	AT5G04340	ZAT6; C2H2 nucleic acid binding / transcription factor/ zinc ion binding	0.944461	1.92447	6.6948	103.594	9.95028	2.87334e-06	0.000100523
261564_at	16664	AT1G01720	ATAF1 (Arabidopsis NAC domain containing protein 2); transcription factor	0.935368	1.91238	9.968	1001.54	12.6183	3.61645e-07	2.19392e-05
247921_at	3021	AT5G57660	COL5, CONSTANS-LIKE 5; BBX6; zinc finger (B-box type) family protein	0.930447	1.90587	9.89976	955.27	13.7765	1.65752e-07	1.24779e-05
267246_at	22346	AT2G30250	WRKY25 (WRKY DNA-binding protein 25); transcription factor	0.88813	1.85078	5.49332	45.0459	12.9501	2.8737e-07	1.82588e-05
247035_at	2135	AT5G67110	ALC (ALCATRAZ); DNA binding / transcription factor	0.887413	1.84986	9.96407	998.816	13.157	2.49646e-07	1.66504e-05
248801_at	3901	AT5G47370	HAT2; transcription factor	0.880934	1.84157	9.08255	542.152	11.3739	9.01499e-07	4.31094e-05
266719_at	21819	AT2G46830	CCA1 (CIRCADIAN CLOCK ASSOCIATED 1); transcription factor	0.849777	1.80222	8.64494	400.299	13.5736	1.892e-07	1.36141e-05
245051_at	151	AT2G23320	WRKY15 (WRKY DNA-binding protein 15); transcription factor	0.822638	1.76864	8.54477	373.451	8.45984	1.13511e-05	0.000263664
261942_at	17042	AT1G22590	AGL87; MADS domain transcription factor family protein	0.821904	1.76774	7.62661	197.624	12.0636	5.37775e-07	2.90853e-05
247543_at	2643	AT5G61600	ERF104; ethylene-responsive transcription factor family	0.820643	1.76619	7.76602	217.673	10.4154	1.93845e-06	7.55829e-05
264746_at	19846	AT1G62300	WRKY6 (WRKY DNA-binding protein 6); transcription factor	0.803017	1.74475	6.00505	64.2245	6.65682	7.91296e-05	0.0011359
254016_at	9116	AT4G26150	CGA1; GATA transcription factor family protein	0.799269	1.74022	6.16892	71.9499	8.63386	9.57548e-06	0.000233851
247199_at	2299	AT5G65210	TGA1; bZIP family transcription factor protein	0.798492	1.73928	6.44248	86.972	7.34144	3.63295e-05	0.000636464
259751_at	14851	AT1G71030	MYBL2 (Arabidopsis myb-like 2); DNA binding / transcription factor	0.795165	1.73528	9.67099	815.189	11.5353	7.96904e-07	3.926e-05
261648_at	16748	AT1G27730	STZ (SALT TOLERANCE ZINC FINGER); nucleic acid binding / transcription factor/ zinc ion binding	0.780014	1.71715	6.2041	73.7257	7.72841	2.39444e-05	0.000463251
245901_at	1001	AT5G11060	KNAT4 (KNOTTED1-LIKE HOMEOBOX GENE 4); transcription factor	0.777693	1.71439	9.37754	665.154	12.4072	4.19794e-07	2.43651e-05
250024_at	5124	AT5G18270	ANAC087; NAC domain transcription factor	0.771347	1.70686	5.62742	49.4334	8.40738	1.19548e-05	0.000273784
255734_at	10834	AT1G25550	HHO3; MYB family transcription factor	0.758983	1.6923	8.03084	261.532	5.26989	0.000458618	0.00431507
256131_at	11231	AT1G13600	bZIP58; bZIP transcription factor family protein	0.750845	1.68278	5.93068	60.9976	5.69554	0.00026021	0.00283183
263158_at	18258	AT1G54160	NF-YA5; CCAAT-binding transcription factor (CBF-B/NF-YA) family protein	0.740697	1.67098	7.36583	164.943	10.3305	2.08057e-06	7.93607e-05
259793_at	14893	AT1G64380	ERF061; DREB subfamily A-6 of ERF/AP2 transcription factor family	0.720399	1.64764	7.79574	222.204	7.18207	4.33389e-05	0.00072369
250858_at	5958	AT5G04760	DIV2; MYB family transcription factor	0.714338	1.64073	8.66901	407.034	10.9442	1.26154e-06	5.47068e-05
251497_at	6597	AT3G59060	PIL6 (PHYTOCHROME-INTERACTING FACTOR 5); DNA binding / transcription factor	0.703034	1.62792	7.91806	241.866	5.95023	0.000187602	0.00221605
259364_at	14464	AT1G13260	RAV1 (Related to ABI3/VP1 1); DNA binding / transcription factor	0.701876	1.62662	6.0449	66.0233	7.3079	3.76948e-05	0.000654353
247666_at	2766	AT5G60140	transcriptional factor B3 family protein	0.701428	1.62611	8.07752	270.131	4.50429	0.00135651	0.00979178
248448_at	3548	AT5G51190	ERF105; AP2 domain-containing transcription factor, putative	0.684808	1.60749	5.99756	63.8918	3.66943	0.00486595	0.0262269
255794_at	10894	AT2G33480	ANAC041 (Arabidopsis NAC domain containing protein 41); transcription factor	0.684634	1.60729	8.57831	382.234	8.35752	1.25614e-05	0.000284534
263988_at	19088	AT2G42830	SHP2 (SHATTERPROOF 2); MADS domain transcription factor	0.673241	1.59465	8.59274	386.077	7.75669	2.32402e-05	0.000452697
258975_at	14075	AT3G01970	WRKY45 (WRKY DNA-binding protein 45); transcription factor	0.659616	1.57966	5.61305	48.9436	5.81459	0.000223065	0.00252262
265260_at	20360	AT2G43000	ANAC042 (Arabidopsis NAC domain containing protein 42); transcription factor	0.658851	1.57882	4.93758	30.6451	6.69044	7.6064e-05	0.0011044
247655_at	2755	AT5G59820	RHL41 (RESPONSIVE TO HIGH LIGHT 41); zinc finger transcription factor/ zinc ion binding	0.654222	1.57377	7.96273	249.471	8.61281	9.7732e-06	0.000237915
251848_at	6948	AT3G54620	BZO2H4 (basic leucine zipper O2 homolog 4); transcription factor	0.64486	1.56359	9.20567	590.45	9.87921	3.05562e-06	0.000104496
255568_at	10668	AT4G01250	WRKY22 (WRKY DNA-binding protein 22); transcription factor	0.627732	1.54513	5.94249	61.4989	5.47059	0.000349965	0.00351406
255596_at	10696	AT4G01720	WRKY47 (WRKY DNA-binding protein 47); transcription factor	0.62719	1.54455	5.50666	45.4644	7.05399	5.00438e-05	0.000809574
257766_at	12866	AT3G23030	IAA2 (indoleacetic acid-induced protein 2); transcription factor	0.625709	1.54297	8.00622	257.106	9.12967	5.98476e-06	0.000168951
262284_at	17384	AT1G68670	HHO2; MYB family transcription factor	0.623628	1.54075	9.8969	953.377	7.25423	3.99974e-05	0.000685971
245084_at	184	AT2G23290	MYB70 (myb domain protein 70); DNA binding / transcription factor	0.620972	1.53791	8.39819	337.369	10.0717	2.58892e-06	9.28509e-05
246996_at	2096	AT5G67420	LBD37; LOB domain protein 37 / lateral organ boundaries domain protein 37	0.617577	1.5343	9.932	976.853	9.65971	3.70367e-06	0.000119561
261663_at	16763	AT1G18330	EPR1 (EARLY-PHYTOCHROME-RESPONSIVE1); DNA binding / transcription factor	0.613377	1.52984	8.68646	411.988	8.58441	1.00469e-05	0.000241741
260581_at	15681	AT2G47190	MYB2 (myb domain protein 2); DNA binding / transcription factor	0.603565	1.51947	5.88895	59.2586	4.82047	0.000857949	0.00693473
254955_at	10055	AT4G10920	KELP; DNA binding / transcription coactivator	0.59747	1.51306	8.50334	362.878	8.58841	1.00079e-05	0.000241193
247696_at	2796	AT5G59780	MYB59 (myb domain protein 59); DNA binding / transcription factor	0.595872	1.51139	6.0792	67.6115	6.60636	8.3986e-05	0.00119063
249415_at	4515	AT5G39660	CDF2 (CYCLING DOF FACTOR 2); DNA binding / protein binding / transcription factor	0.594414	1.50986	7.85198	231.038	8.86133	7.69785e-06	0.000200767
263081_at	18181	AT2G27220	BLH5 (BELL1-LIKE HOMEODOMAIN 5); DNA binding / transcription factor	0.588546	1.50373	5.66184	50.6271	5.15389	0.000537592	0.00484109
260856_at	15956	AT1G21910	DREB26; AP2 domain-containing transcription factor family protein	0.586444	1.50154	5.6656	50.7595	8.02293	1.76171e-05	0.000367991
255675_at	10775	AT4G00480	MYC1 (Arabidopsis thaliana myc-related transcription factor 1); DNA binding / transcription factor	-0.592883	0.663017	7.19845	146.875	-5.14595	0.000543507	0.00488663
257571_at	12671	AT3G16870	GATA17; GATA zinc finger transcription factor family protein	-0.600626	0.659468	8.21025	296.164	-6.40264	0.00010716	0.00143445
250108_at	5208	AT5G15150	ATHB-3 (ARABIDOPSIS THALIANA HOMEOBOX 3); DNA binding / transcription factor	-0.605379	0.657299	5.71952	52.6922	-9.38911	4.71862e-06	0.000143509
253065_at	8165	AT4G37740	GRF2 (GROWTH REGULATING FACTOR 2)	-0.613053	0.653812	7.47889	178.39	-8.82205	7.99095e-06	0.000205726
250051_at	5151	AT5G17800	MYB56 (myb domain protein 56); DNA binding / transcription factor	-0.625181	0.648338	6.34946	81.5416	-6.60221	8.43993e-05	0.00119574
248839_at	3939	AT5G46690	BHLH071 (BETA HLH PROTEIN 71); DNA binding / transcription factor	-0.627436	0.647326	7.38241	166.85	-6.32535	0.000117698	0.00155005
254066_at	9166	AT4G25480	DREB1A (DEHYDRATION RESPONSE ELEMENT B1A); DNA binding / transcription factor/ transcriptional activator	-0.643891	0.639985	6.11476	69.299	-5.33725	0.000418565	0.00402847
249383_at	4483	AT5G39860	PRE1 (PACLOBUTRAZOL RESISTANCE1); DNA binding / transcription factor	-0.644189	0.639852	6.8134	112.47	-5.74947	0.000243	0.002689
246274_at	1374	AT4G36620	GATA19; zinc finger (GATA type) family protein	-0.644829	0.639569	5.35651	40.9703	-9.75364	3e-06	0.000112
266797_at	21897	AT2G22840	GRF1 (GROWTH-REGULATING FACTOR 1)	-0.661225	0.632341	7.61157	195.574	-8.08644	1.65077e-05	0.000350924
248559_at	3659	AT5G50010	bHLH145; transcription factor/ transcription regulator	-0.662747	0.631674	6.58587	96.0603	-8.06501	1.68733e-05	0.000355712
253247_at	8347	AT4G34610	BLH6 (BELL1-LIKE HOMEODOMAIN 5); DNA binding / transcription factor	-0.681333	0.623589	6.52816	92.2938	-8.42118	1.17926e-05	0.000271761
261840_at	16940	AT1G16070	TLP8 (TUBBY LIKE PROTEIN 8); transcription factor	-0.682319	0.623163	7.24034	151.202	-7.52126	2.98717e-05	0.000554413
261794_at	16894	AT1G16060	ADAP; AP2/ERF transcription factor family	-0.682598	0.623042	8.80134	446.137	-8.60825	9.81655e-06	0.000238462
259466_at	14566	AT1G19050	ARR7 (RESPONSE REGULATOR 7); transcription regulator/ two-component response regulator	-0.692416	0.618817	8.98033	505.065	-7.70313	2.45935e-05	0.000474199
258516_at	13616	AT3G06490	MYB108 (BOTRYTIS-SUSCEPTIBLE1, myb domain protein 108); DNA binding / transcription factor	-0.703336	0.61415	5.30049	39.4101	-4.98558	0.000679292	0.00582286
253514_at	8614	AT4G31805	POLAR; WRKY family transcription factor	-0.705775	0.613113	6.59642	96.7652	-8.45429	1.14133e-05	0.000264571
258204_at	13304	AT3G13960	GRF5 (GROWTH-REGULATING FACTOR 5)	-0.714819	0.609282	7.53288	185.193	-6.81562	6.57359e-05	0.000991691
251560_at	6660	AT3G57920	SPL15 (squamosa promoter-binding protein-like 15)	-0.715769	0.608881	6.61601	98.0884	-8.05413	1.70622e-05	0.000358699
267639_at	22739	AT2G42200	SPL9 (squamosa promoter-binding protein-like 9)	-0.726464	0.604384	9.54067	744.781	-9.35488	4.86744e-06	0.00014686
257491_at	12591	AT1G06170	bHLH089; basic helix-loop-helix (bHLH) family protein	-0.735906	0.600441	6.56613	94.7549	-7.01639	5.22206e-05	0.000838248
247451_at	2551	AT5G62320	MYB99 (myb domain protein 99); DNA binding / transcription factor	-0.738326	0.599435	7.23564	150.711	-5.9213	0.000194618	0.0022742
264054_at	19154	AT2G22540	SVP (SHORT VEGETATIVE PHASE); transcription factor	-0.740738	0.598433	5.98863	63.4975	-8.34623	1.27033e-05	0.000287178
259972_at	15072	AT1G76420	CUC3 (CUP SHAPED COTYLEDON3); transcription factor	-0.741672	0.598046	5.89267	59.4114	-8.26991	1.37104e-05	0.000304513
258237_at	13337	AT3G27810	MYB21 (MYB DOMAIN PROTEIN 21); DNA binding / transcription factor	-0.74828	0.595313	6.68198	102.677	-6.03442	0.000168694	0.00204567
264882_at	19982	AT1G61110	ANAC025 (Arabidopsis NAC domain containing protein 25); transcription factor	-0.765966	0.58806	9.84429	919.233	-8.00256	1.79899e-05	0.000373014
253406_at	8506	AT4G32890	GATA9; zinc finger (GATA type) family protein	-0.766839	0.587704	6.4652	88.3525	-6.82981	6.46653e-05	0.000978777
247182_at	2282	AT5G65410	ATHB25/ZFHD2 (ZINC FINGER HOMEODOMAIN 2); DNA binding / transcription factor	-0.771244	0.585912	9.50224	725.203	-7.61716	2.69494e-05	0.000509292
247643_at	2743	AT5G60450	ARF4 (AUXIN RESPONSE FACTOR 4); transcription factor	-0.790766	0.578037	7.59901	193.879	-10.2597	2.20774e-06	8.26906e-05
247549_at	2649	AT5G61420	MYB28 (myb domain protein 28); DNA binding / transcription factor	-0.817898	0.567268	9.1074	551.569	-11.3967	8.85898e-07	4.26315e-05
263092_at	18192	AT2G16210	REM24; transcriptional factor B3 family protein	-0.820264	0.566338	7.60065	194.099	-5.26229	0.000463392	0.00434799
255878_at	10978	AT2G40620	bZIP18; transcription factor family protein	-0.844456	0.556921	7.35906	164.171	-8.47259	1.12095e-05	0.000260906
252374_at	7474	AT3G48100	ARR5 (ARABIDOPSIS RESPONSE REGULATOR 5); transcription regulator/ two-component response regulator	-0.873318	0.54589	5.49832	45.2023	-9.3229	5.01112e-06	0.000150202
251575_at	6675	AT3G58120	bZIP61; transcription factor family protein	-0.892723	0.538597	7.62421	197.295	-8.49962	1.09155e-05	0.000256683
257267_at	12367	AT3G15030	TCP4 (TCP family transcription factor 4, maternal effect embryo arrest 35); transcription factor	-0.930275	0.524758	8.31503	318.473	-12.7986	3.18967e-07	1.96639e-05
251598_at	6698	AT3G57600	DREB2F; AP2 domain-containing transcription factor, putative	-0.959567	0.514211	7.37559	166.064	-16.0763	4.14862e-08	4.95445e-06
250982_at	6082	AT5G03150	JKD (JACKDAW); zinc finger (C2H2 type) family protein	-0.966934	0.511592	5.9134	60.2712	-6.9525	5.61606e-05	0.000879823
259165_at	14265	AT3G01470	ATHB-1 (Homeobox-leucine zipper protein HAT5); transcription factor	-1.17974	0.441433	8.22295	298.783	-16.4618	3.34963e-08	4.36601e-06
265263_at	20363	AT2G42940	AHL16; AT-Hook DNA-binding family protein	-1.26363	0.416495	7.75879	216.585	-9.88821	3.03184e-06	0.000103838
248864_at	3964	AT5G46760	MYC3; basic helix-loop-helix (bHLH) family protein	-1.27682	0.412704	9.58124	766.022	-18.5992	1.10764e-08	2.17804e-06
249349_at	4449	AT5G40350	MYB24 (myb domain protein 24); DNA binding / transcription factor	-1.28169	0.411314	6.7219	105.558	-8.9466	7.10135e-06	0.000191262
